# Supplementary material for: Polycyclic Aromatic Hydrocarbons Activate the Aryl Hydrocarbon Receptor and the Constitutive Androstane Receptor to Regulate Xenobiotic Metabolism in Human Liver Cells
Source: MDPI journal article supplement (doi:10.3390/ijms22010372), 2020-12-31
Supplement: s1 [file s1]

**Supplementary material:**

**Polycyclic aromatic hydrocarbons activate the aryl hydrocarbon receptor and the constitutive androstane receptor to regulate xenobiotic metabolism in human liver cells**

Lisa Goedtke<sup>1</sup>, Heike Sprenger<sup>1</sup>, Ute Hofmann<sup>2</sup>, Felix F. Schmidt<sup>3</sup>, Helen S. Hammer<sup>3</sup>, Ulrich M. Zanger<sup>2</sup>, Oliver Poetz<sup>3</sup>, Albrecht Seidel<sup>4</sup>, Albert Braeuning<sup>1</sup>, Stefanie Hessel-Pras<sup>1</sup>

<sup>1</sup> German Federal Institute for Risk Assessment (BfR), Max-Dohrn-Straße 8-10, 10589 Berlin, Germany

<sup>2</sup> Dr. Margarete Fischer-Bosch Institute of Clinical Pharmacology, Auerbachstr. 112, 70376 Stuttgart, and University of Tübingen, Tübingen, Germany

<sup>3</sup> SIGNATOPE GmbH, Markwiesenstraße 55, 72770 Reutlingen, Germany

<sup>4</sup> Biochemical Institute for Environmental Carcinogens, Prof. Dr. Gernot Grimmer Foundation, Lurup 4, 22927 Grosshansdorf, Germany

Corresponding author:

Dr. Stefanie Hessel-Pras (ORCID: 0000-0002-6153-0035)

German Federal Institute for Risk Assessment, Max-Dohrn-Straße 8-10, 10589 Berlin, Germany

e-mail: stefanie.hessel-pras@bfr.bund.de

Tel: +49 30 18412 25203

Table S1: Plasmids used for transfection of HepG2 cells.

| reporter gene assay | Plasmid                        | plasmid amount [ng/well] |
|---------------------|--------------------------------|--------------------------|
| AHR                 | pGL4.26-XRE6                   | 40                       |
| CAR                 | pcDNA5-GAL4/DBD-hCAR/LBD(+3aa) | 50                       |
|                     | pGAL4-(UAS)5-TK-LUC            | 40                       |
| for both assays     | pcDNA3-RLuc                    | 1                        |

Table S2: Primer sequences used for gene expression analyses.

| gene          | sequence |                            |
|---------------|----------|----------------------------|
| <i>CYP1A1</i> | forward  | 5'-ACCCTGAAGGTGACAGTTCC-3' |
|               | reverse  | 5'-TCTTGGAGGTGGCTGAGGTA-3' |
| <i>CYP1A2</i> | forward  | 5'-CTTCGCTACCTGCCTAACCC-3' |
|               | reverse  | 5'-CCCGGACACTGTTCTTGTCA-3' |
| <i>CYP2B6</i> | forward  | 5'-TTCGGCGATTCTCTGTGACC-3' |
|               | reverse  | 5'-ATGAGGGCCCCCTTGGAT-3'   |
| <i>ACTB</i>   | forward  | 5'-CCTTGACATGCCGGAG-3'     |
|               | reverse  | 5'-GCACAGAGCCTCGCCTT-3'    |
| <i>GAPDH</i>  | forward  | 5'-GTCAAGGCTGAGAACGGGAA-3' |
|               | reverse  | 5'-AAATGAGCCCCAGCCTTCTC-3' |
